# Supplementary material
Source: bioRxiv or medRxiv preprint supplement (https://www.biorxiv.org/highwire/filestream/108602/field_highwire_adjunct_files/1/178806-10.pdf)
Supplement: Supplementary file [file 178806-10.pdf]

### Number of hits per IDP, by heritability

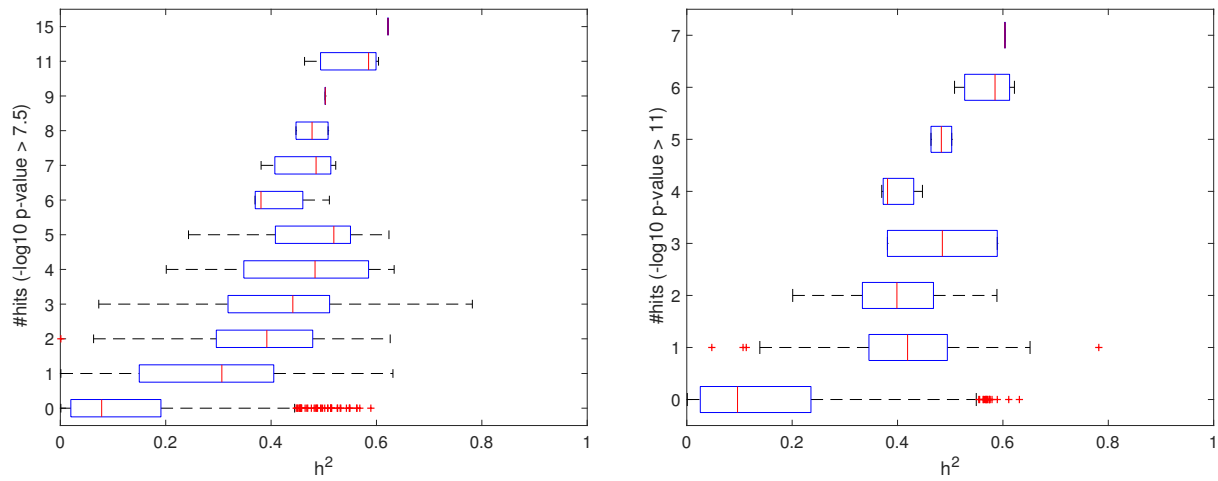

**Supplementary Figure 10** – Comparison of number of associated loci (y-axis) and SNP-heritability (x-axis) for each IDP at two different significance thresholds :  $-\log_{10}(P) > 7.5$  (left) and  $-\log_{10}(P) > 11$  (right).
